# Supplementary material for: Synthesis and properties of four coordination polymers built from a semi-rigid tripod carboxylic acid
Source: Royal Society of Chemistry journal article supplement (doi:10.1039/c3ce41186a), 2013-01-01
Supplement: c3ce41186a.pdf [file c3ce41186a.pdf]

Supplementary Information

**Synthesis and properties of four coordination polymers built  
from a semi-rigid tripod carboxylic acid**

*Lian Zhou,<sup>a,b</sup> Jun Zhang,<sup>c</sup> Yi-Zhi Li,<sup>a</sup> Hong-Bin Du<sup>\*a</sup>*

<sup>a</sup> State Key Laboratory of Coordination Chemistry, School of Chemistry and  
Chemical Engineering, Nanjing University, Nanjing, 210093, China.

<sup>b</sup> School of Chemical Engineering, Qinghai University, Xining, Qinghai, 810006,  
China.

<sup>c</sup> School of Materials and Chemical Engineering, Anhui University of Architecture,  
Hefei, 230601, China.

**Content**

**1- Selected bond lengths and angles of compounds 1-4.**

**2- Powder X-ray diffraction of compounds 1-4.**

**3- Additional crystallographic figures.**

**4- TGA curves for compounds 1-4.**

## 1- Selected bond lengths and angles of compounds 1-4

**Table S1** Selected bond lengths (Å) and angles (°) for **1-4**.

| <b>1</b>                                 |            |                                          |            |
|------------------------------------------|------------|------------------------------------------|------------|
| Cd1—O8                                   | 2.175(4)   | Cd1—O4 <sup>iii</sup>                    | 2.232(4)   |
| Cd1—O1 <sup>v</sup>                      | 2.321(3)   | Cd1—O2 <sup>v</sup>                      | 2.410(4)   |
| Cd1—O5 <sup>iii</sup>                    | 2.511(4)   | Cd1—O1W                                  | 2.536(4)   |
| Cd2—O2W                                  | 1.998(3)   | Cd2—O10                                  | 2.267(4)   |
| Cd2—O7                                   | 2.287(4)   | Cd2—O3W                                  | 2.333(4)   |
| Cd2—O1W                                  | 2.581(5)   | Cd3—O11                                  | 2.131(4)   |
| Cd3—O14 <sup>ii</sup>                    | 2.271(5)   | Cd3—O16 <sup>vi</sup>                    | 2.334(4)   |
| Cd3—O17 <sup>vi</sup>                    | 2.361(4)   | Cd3—O4W                                  | 2.394(4)   |
| Cd3—O13 <sup>ii</sup>                    | 2.643(4)   |                                          |            |
| O8—Cd1—O4 <sup>iii</sup>                 | 87.28(16)  | O8—Cd1—O1 <sup>v</sup>                   | 106.83(14) |
| O4 <sup>iii</sup> —Cd1—O1 <sup>v</sup>   | 140.10(14) | O8—Cd1—O2 <sup>v</sup>                   | 95.99(14)  |
| O4 <sup>iii</sup> —Cd1—O2 <sup>v</sup>   | 87.81(13)  | O1 <sup>v</sup> —Cd1—O2 <sup>v</sup>     | 54.33(12)  |
| O8—Cd1—O5 <sup>iii</sup>                 | 130.97(13) | O4 <sup>iii</sup> —Cd1—O5 <sup>iii</sup> | 53.77(13)  |
| O1 <sup>v</sup> —Cd1—O5 <sup>iii</sup>   | 122.10(13) | O2 <sup>v</sup> —Cd1—O5 <sup>iii</sup>   | 109.19(13) |
| O8—Cd1—O1W                               | 118.11(15) | O4 <sup>iii</sup> —Cd1—O1W               | 117.81(13) |
| O1 <sup>v</sup> —Cd1—O1W                 | 88.69(13)  | O2 <sup>v</sup> —Cd1—O1W                 | 136.63(13) |
| O5 <sup>iii</sup> —Cd1—O1W               | 69.08(13)  | O2W—Cd2—O10                              | 91.02(13)  |
| O2W—Cd2—O7                               | 86.03(12)  | O10—Cd2—O7                               | 173.40(14) |
| O2W—Cd2—O3W                              | 86.62(13)  | O10—Cd2—O3W                              | 95.18(14)  |
| O7—Cd2—O3W                               | 90.54(12)  | O2W—Cd2—O1W                              | 113.05(14) |
| O10—Cd2—O1W                              | 99.40(14)  | O7—Cd2—O1W                               | 76.43(13)  |
| O3W—Cd2—O1W                              | 155.09(12) | O11—Cd3—O14 <sup>ii</sup>                | 116.23(17) |
| O11—Cd3—O16 <sup>vi</sup>                | 147.52(16) | O14 <sup>ii</sup> —Cd3—O16 <sup>vi</sup> | 96.21(16)  |
| O11—Cd3—O17 <sup>vi</sup>                | 101.73(15) | O14 <sup>ii</sup> —Cd3—O17 <sup>vi</sup> | 120.98(16) |
| O16 <sup>vi</sup> —Cd3—O17 <sup>vi</sup> | 56.26(13)  | O11—Cd3—O4W                              | 83.31(14)  |
| O14 <sup>ii</sup> —Cd3—O4W               | 82.42(16)  | O16 <sup>vi</sup> —Cd3—O4W               | 103.80(13) |
| O17 <sup>vi</sup> —Cd3—O4W               | 148.40(15) | O11—Cd3—O13 <sup>ii</sup>                | 98.68(15)  |
| O14 <sup>ii</sup> —Cd3—O13 <sup>ii</sup> | 52.71(15)  | O16 <sup>vi</sup> —Cd3—O13 <sup>ii</sup> | 99.79(13)  |
| O17 <sup>vi</sup> —Cd3—O13 <sup>ii</sup> | 79.46(14)  | O4W—Cd3—O13 <sup>ii</sup>                | 131.11(14) |

(i) x, -1+y, z; (ii) x, y, -1+z; (iii) x, y, 1+z; (iv) x, -1+y, 1+z; (v) x, 1+y, z; (vi) x, 1+y, -1+z.

## **2**

|                       |          |                       |          |
|-----------------------|----------|-----------------------|----------|
| Mn1—O2                | 2.111(2) | Mn1—O17 <sup>i</sup>  | 2.118(2) |
| Mn1—O13 <sup>ii</sup> | 2.129(2) | Mn1—O5 <sup>iii</sup> | 2.170(2) |
| Mn1—O10               | 2.308(2) | Mn1—O11               | 2.467(2) |
| Mn2—O8 <sup>iv</sup>  | 2.076(2) | Mn2—O4 <sup>iii</sup> | 2.152(2) |
| Mn2—O14 <sup>ii</sup> | 2.196(2) | Mn2—O20               | 2.220(2) |
| Mn2—O11               | 2.236(2) | Mn3—O16 <sup>i</sup>  | 2.072(2) |
| Mn3—O1                | 2.117(2) | Mn3—O2W               | 2.139(2) |
| Mn3—O19               | 2.214(2) | Mn3—O1W               | 2.215(2) |

|                                         |            |                                          |            |
|-----------------------------------------|------------|------------------------------------------|------------|
| Mn3—O10                                 | 2.249(2)   |                                          |            |
| O2—Mn1—O17 <sup>i</sup>                 | 96.21(7)   | O2—Mn1—O13 <sup>ii</sup>                 | 88.56(8)   |
| O17 <sup>i</sup> —Mn1—O13 <sup>ii</sup> | 115.48(8)  | O2—Mn1—O5 <sup>iii</sup>                 | 178.89(8)  |
| O17 <sup>i</sup> —Mn1—O5 <sup>iii</sup> | 84.86(7)   | O13 <sup>ii</sup> —Mn1—O5 <sup>iii</sup> | 90.71(8)   |
| O2—Mn1—O10                              | 92.46(8)   | O17 <sup>i</sup> —Mn1—O10                | 106.05(8)  |
| O13 <sup>ii</sup> —Mn1—O10              | 138.09(8)  | O5 <sup>iii</sup> —Mn1—O10               | 87.52(7)   |
| O2—Mn1—O11                              | 99.71(7)   | O17 <sup>i</sup> —Mn1—O11                | 154.90(8)  |
| O13 <sup>ii</sup> —Mn1—O11              | 84.34(8)   | O5 <sup>iii</sup> —Mn1—O11               | 79.39(7)   |
| O10—Mn1—O11                             | 54.19(7)   | O8 <sup>iv</sup> —Mn2—O4 <sup>iii</sup>  | 97.44(9)   |
| O8 <sup>iv</sup> —Mn2—O14 <sup>ii</sup> | 132.43(10) | O4 <sup>iii</sup> —Mn2—O14 <sup>ii</sup> | 89.88(9)   |
| O8 <sup>iv</sup> —Mn2—O20               | 91.06(9)   | O4 <sup>iii</sup> —Mn2—O20               | 170.93(8)  |
| O14 <sup>ii</sup> —Mn2—O20              | 82.03(10)  | O8 <sup>iv</sup> —Mn2—O11                | 100.22(9)  |
| O4 <sup>iii</sup> —Mn2—O11              | 101.20(8)  | O14 <sup>ii</sup> —Mn2—O11               | 124.38(8)  |
| O20—Mn2—O11                             | 80.27(9)   | O16 <sup>i</sup> —Mn3—O1                 | 96.04(10)  |
| O16 <sup>i</sup> —Mn3—O2W               | 88.57(10)  | O1—Mn3—O2W                               | 171.38(9)  |
| O16 <sup>i</sup> —Mn3—O19               | 178.15(9)  | O1—Mn3—O19                               | 84.77(8)   |
| O2W—Mn3—O19                             | 90.84(8)   | O16 <sup>i</sup> —Mn3—O1W                | 93.35(11)  |
| O1—Mn3—O1W                              | 85.37(9)   | O2W—Mn3—O1W                              | 87.10(9)   |
| O19—Mn3—O1W                             | 88.37(9)   | O16 <sup>i</sup> —Mn3—O10                | 88.95(9)   |
| O1—Mn3—O10                              | 94.07(8)   | O2W—Mn3—O10                              | 93.28(8)   |
| O19—Mn3—O10                             | 89.33(8)   | O1W—Mn3—O10                              | 177.67(10) |

(i) x, y, 1+z; (ii) x, 1+y, 1+z; (iii) -1+x, -1+y, z; (iv) -1+x, -1+y, -1+z; (v) 1+x, 1+y, z; (vi) 1+x, 1+y, 1+z; (vii) x, -1+y, -1+z; (viii) x, y, -1+z.

### 3

|                                           |           |                                           |            |
|-------------------------------------------|-----------|-------------------------------------------|------------|
| Co1—O14 <sup>i</sup>                      | 2.062(2)  | Co1—O12 <sup>iii</sup>                    | 2.065(2)   |
| Co1—O1                                    | 2.160(2)  | Co2—O15 <sup>ii</sup>                     | 2.026(2)   |
| Co2—O13 <sup>iii</sup>                    | 2.008(2)  | Co2—O1                                    | 2.134(2)   |
| Co2—O2                                    | 2.141(2)  | Co2—O4                                    | 2.176(2)   |
| Co2—O3                                    | 2.182(2)  | Co3—O7                                    | 1.909(2)   |
| Co3—O21 <sup>iii</sup>                    | 1.925(2)  | Co3—O20 <sup>ii</sup>                     | 1.998(2)   |
| Co3—O8                                    | 2.012(2)  | Co4—O19 <sup>ii</sup>                     | 2.066(2)   |
| Co4—O23                                   | 2.066(2)  | Co4—O22 <sup>iii</sup>                    | 2.079(3)   |
| Co4—O6                                    | 2.083(2)  | Co4—O5                                    | 2.102(2)   |
| Co4—O4                                    | 2.127(2)  |                                           |            |
| O14 <sup>i</sup> —Co1—O14 <sup>ii</sup>   | 180.0(1)  | O14 <sup>i</sup> —Co1—O12 <sup>iii</sup>  | 92.03(9)   |
| O14 <sup>ii</sup> —Co1—O12 <sup>iii</sup> | 87.97(9)  | O12 <sup>iii</sup> —Co1—O12 <sup>iv</sup> | 180.000(1) |
| O14 <sup>i</sup> —Co1—O1                  | 85.50(9)  | O14 <sup>ii</sup> —Co1—O1                 | 94.50(9)   |
| O12 <sup>iii</sup> —Co1—O1                | 89.80(9)  | O12 <sup>iv</sup> —Co1—O1                 | 90.20(9)   |
| O1—Co1—O1 <sup>v</sup>                    | 180.0(1)  | O13 <sup>iv</sup> —Co2—O15 <sup>ii</sup>  | 95.47(9)   |
| O13 <sup>iv</sup> —Co2—O1                 | 104.11(9) | O15 <sup>ii</sup> —Co2—O1                 | 99.83(9)   |
| O13 <sup>iv</sup> —Co2—O2                 | 164.30(9) | O15 <sup>ii</sup> —Co2—O2                 | 93.22(9)   |
| O1—Co2—O2                                 | 61.41(9)  | O13 <sup>iv</sup> —Co2—O4                 | 93.61(9)   |
| O15 <sup>ii</sup> —Co2—O4                 | 96.15(9)  | O1—Co2—O4                                 | 154.75(9)  |

|              |           |              |           |
|--------------|-----------|--------------|-----------|
| O2—Co2—O4    | 98.44(9)  | O13iv—Co2—O3 | 87.77(9)  |
| O15ii—Co2—O3 | 156.22(9) | O1—Co2—O3    | 102.20(9) |
| O2—Co2—O3    | 89.54(9)  | O4—Co2—O3    | 60.10(9)  |

(i) 2-x, 2-y, 1-z; (ii) x, y, 1+z; (iii) 1-x, 1-y, 1-z; (iv) 1+x, 1+y, 1+z; (v) 2-x, 2-y, 2-z; (vi) -1+x, -1+y, -1+z; (vii) x, y, -1+z.

#### 4

|                                        |            |                                        |            |
|----------------------------------------|------------|----------------------------------------|------------|
| Zn1—O15 <sup>v</sup>                   | 2.0576(18) | Zn1—O18 <sup>i</sup>                   | 2.0728(19) |
| Zn1—O1                                 | 2.0892(19) | Zn1—O12                                | 2.081(2)   |
| Zn1 <sup>iii</sup> —O15                | 2.0575(18) | Zn1 <sup>iv</sup> —O18                 | 2.0727(19) |
| Zn1—O1W                                | 2.113(2)   | Zn2—O3                                 | 1.9290(18) |
| Zn2—O6 <sup>vi</sup>                   | 1.978(2)   | Zn2—O9 <sup>iv</sup>                   | 1.970(2)   |
| Zn3—O11                                | 1.944(2)   | Zn3—O14 <sup>v</sup>                   | 1.937(2)   |
| Zn3 <sup>iii</sup> —O14                | 1.937(2)   | Zn3—O17 <sup>i</sup>                   | 1.9672(18) |
| Zn3—O20                                | 2.036(2)   |                                        |            |
| O2W—Zn1—O15 <sup>v</sup>               | 89.97(7)   | O2W—Zn1—O18 <sup>i</sup>               | 176.50(8)  |
| O15 <sup>v</sup> —Zn1—O18 <sup>i</sup> | 93.14(7)   | O2W—Zn1—O12                            | 88.76(8)   |
| O15 <sup>v</sup> —Zn1—O12              | 94.52(8)   | O18 <sup>i</sup> —Zn1—O12              | 92.58(8)   |
| O2W—Zn1—O1                             | 87.17(8)   | O15 <sup>v</sup> —Zn1—O1               | 174.51(8)  |
| O18 <sup>i</sup> —Zn1—O1               | 89.59(7)   | O12—Zn1—O1                             | 90.11(8)   |
| O2W—Zn1—O1W                            | 92.83(8)   | O15 <sup>v</sup> —Zn1—O1W              | 88.16(8)   |
| O18 <sup>i</sup> —Zn1—O1W              | 85.69(8)   | O12—Zn1—O1W                            | 176.90(7)  |
| O1—Zn1—O1W                             | 87.30(8)   | O3—Zn2—O9 <sup>iv</sup>                | 115.07(8)  |
| O3—Zn2—O6 <sup>vi</sup>                | 103.74(8)  | O9 <sup>iv</sup> —Zn2—O6 <sup>vi</sup> | 106.16(8)  |
| O3—Zn2—O3W                             | 123.30(8)  | O9 <sup>iv</sup> —Zn2—O3W              | 109.93(8)  |
| O6 <sup>vi</sup> —Zn2—O3W              | 94.77(8)   | O3—Zn2—C33 <sup>iv</sup>               | 110.56(8)  |
| O14 <sup>v</sup> —Zn3—O11              | 123.36(8)  | O14 <sup>v</sup> —Zn3—O17 <sup>i</sup> | 119.60(8)  |
| O11—Zn3—O17 <sup>i</sup>               | 109.90(8)  | O14 <sup>v</sup> —Zn3—O20              | 95.52(8)   |
| O11—Zn3—O20                            | 103.85(9)  | O17 <sup>i</sup> —Zn3—O20              | 97.59(8)   |

(i) 1+x, 1+y, z; (ii) 1+x, 1+y, 1+z; (iii) x, y, 1+z; (iv) -1+x, -1+y, z; (v) x, y, -1+z; (vi) -1+x, -1+y, -1+z.

## 2- Powder X-ray diffraction of compounds 1-4

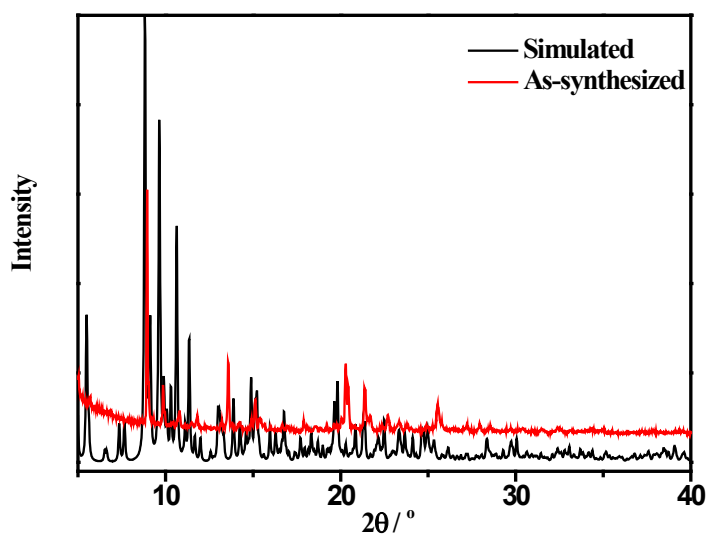

**Figure S1.** X-ray powder diffraction patterns of compound 1.

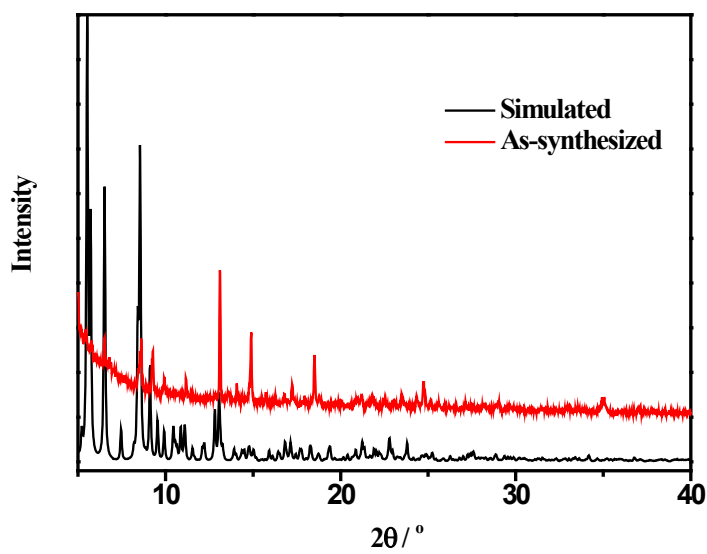

**Figure S2.** X-ray powder diffraction patterns of compound 2.

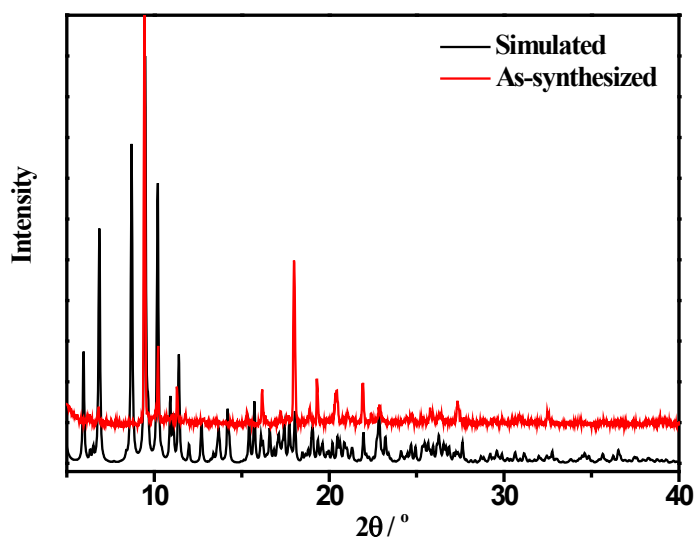

**Figure S3.** X-ray powder diffraction patterns of compound 3.

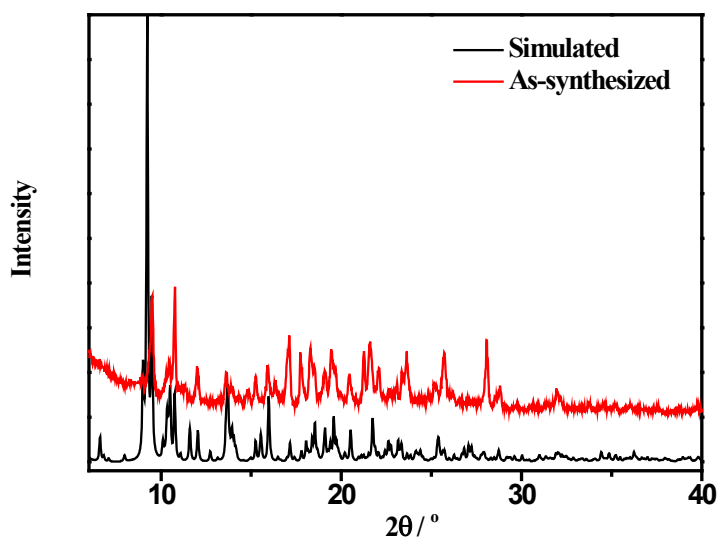

**Figure S4.** X-ray powder diffraction patterns of compound 4.

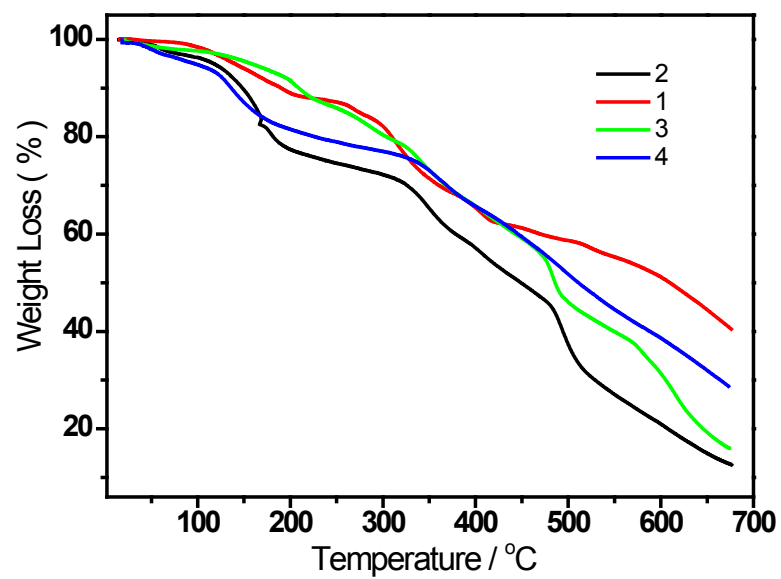

Figure S5. The TGA curves of 1, 2, 3 and 4
